# Supplementary material for: Metallomic profiling to evaluate the response to drug treatment: hydroxyurea as a case study in β-thalassemia patients
Source: Royal Society of Chemistry journal article supplement (doi:10.1039/c6ra28514g), 2017-01-01
Supplement: c6ra28514g1.pdf [file c6ra28514g1.pdf]

**Table-S1:** Age, weight and height of healthy normal subjects and  $\beta$ -thalassemia patients.

| <b>Parameter</b>      | <b>Follow up <math>\beta</math>-Thalassemia Patients on HU (n=40)</b> | <b>Healthy Volunteers (n=45)</b> |
|-----------------------|-----------------------------------------------------------------------|----------------------------------|
| Gender (Male/ Female) | 23/17                                                                 | 23/22                            |
| Age (years)           | 9.93 $\pm$ 6.68                                                       | 18.73 $\pm$ 7.93                 |
| Weight (Kgs)          | 23.53 $\pm$ 12.78                                                     | 47.37 $\pm$ 16.34                |
| Height (cms)          | 118.02 $\pm$ 31.79                                                    | 156.50 $\pm$ 18.73               |

**Table-S2:** Summary of calibration equations and LOD data of the optimized method ( $n = 3$ ).

| <b>Name of elements</b> | <b>Linear calibration range (<math>\mu\text{g L}^{-1}</math>)</b> | <b>Regression equation</b>          | <b>R<sup>2</sup></b> | <b>LOD (<math>\mu\text{g L}^{-1}</math>)</b> |
|-------------------------|-------------------------------------------------------------------|-------------------------------------|----------------------|----------------------------------------------|
| Li                      | 0.1-200                                                           | $y = 3814.14x + 1625.41$            | 0.99996              | 0.016                                        |
| Mg                      | 25-200                                                            | $y = 5840.56x + 22846.68$           | 0.99973              | 0.227                                        |
| Al                      | 25-200                                                            | $y = 6768.43x + 18342.73$           | 0.99955              | 0.773                                        |
| Ca                      | 25-200                                                            | $y = 7.88 \times 10^{-4}x + 0.0064$ | 0.99633              | 6.303                                        |
| V                       | 0.1-200                                                           | $y = 0.6530x + 0.0053$              | 0.99952              | 0.016                                        |
| Cr                      | 0.1-200                                                           | $y = 0.9832x + 0.3070$              | 0.99957              | 0.025                                        |
| Mn                      | 0.1-200                                                           | $y = 0.2868x + 0.1209$              | 0.99978              | 0.072                                        |
| Fe                      | 0.1-200                                                           | $y = 0.7078x + 1.6010$              | 0.99967              | 0.066                                        |
| Co                      | 0.1-200                                                           | $y = 1.9670x + 0.0163$              | 0.99948              | 0.008                                        |
| Ni                      | 0.1-200                                                           | $y = 0.7266x + 0.1445$              | 0.99916              | 0.009                                        |
| Cu                      | 0.1-200                                                           | $y = 2.3350x + 0.6911$              | 0.99953              | 0.081                                        |
| Zn                      | 0.1-200                                                           | $y = 0.2328x + 0.2626$              | 0.99903              | 0.029                                        |
| Se                      | 25-200                                                            | $y = 0.0035x + 8.54 \times 10^{-4}$ | 0.99872              | 0.024                                        |
| Rb                      | 0.1-200                                                           | $y = 0.2169x + 0.0154$              | 0.99979              | 0.047                                        |
| Sr                      | 25-200                                                            | $y = 0.2851x + 0.0369$              | 0.99975              | 0.115                                        |
| Ag                      | 0.1-200                                                           | $y = 0.4652x + 0.0845$              | 0.99974              | 0.029                                        |
| Cd                      | 0.1-200                                                           | $y = 0.0395x + 1.78 \times 10^{-4}$ | 0.9998               | 0.012                                        |
| Ba                      | 25-200                                                            | $y = 0.0220x + 0.0035$              | 0.99955              | 0.143                                        |
| Pb                      | 0.1-200                                                           | $y = 0.1233x + 0.1206$              | 0.99986              | 0.048                                        |

**Table-S3:** Analytical performance for the determination of trace and ultratrace elements in Seronorm™ serum reference material.

| <b>Analyte</b> | <b>Certified value<br/>(acceptable range, µg/L)</b> | <b>Measured value<br/>(µg/L)</b> |
|----------------|-----------------------------------------------------|----------------------------------|
| Li             | 5741 ± 321                                          | 6048.09 ± 29.22                  |
| Al             | 33.6 ± 1.9                                          | 36.87 ± 3.36                     |
| Ca             | 94200 ± 4400                                        | 75312 ± 4964                     |
| Zn             | 1742 ± 82                                           | 2446 ± 192.40                    |
| Sr             | 26.3                                                | 32.22 ± 0.95                     |
| Ni             | 5.8 ± 0.7                                           | 6.37 ± 0.08                      |
| Ag             | 0.16                                                | 0.47 ± 0.06                      |
| Cd             | 0.126                                               | 0.14 ± 0.02                      |
| Rb             | 5.25                                                | 5.97 ± 1.26                      |
| Co             | 1.2 ± 0.2                                           | 1.37 ± 0.004                     |
| Mn             | 15.0 ± 0.9                                          | 20.46 ± 0.30                     |
| Ba             | 126                                                 | 142.59 ± 23.18                   |
| V              | 0.96                                                | 1.59 ± 0.03                      |
| Cr             | 1.5 ± 0.2                                           | 2.07 ± 0.17                      |
| Se             | 107 ± 7.0                                           | 310.36 ± 12.34                   |
| Fe             | 1430 ± 8.0                                          | 1442 ± 5.05                      |
| Pb             | 1.02                                                | 0.94 ± 0.19                      |
| Cu             | 1691 ± 84                                           | 1617 ± 87.68                     |
| Mg             | 20600 ± 1000                                        | 25670 ± 974                      |

*Note.* Data for found values are expressed as mean ± SD ( $n = 3$ ).

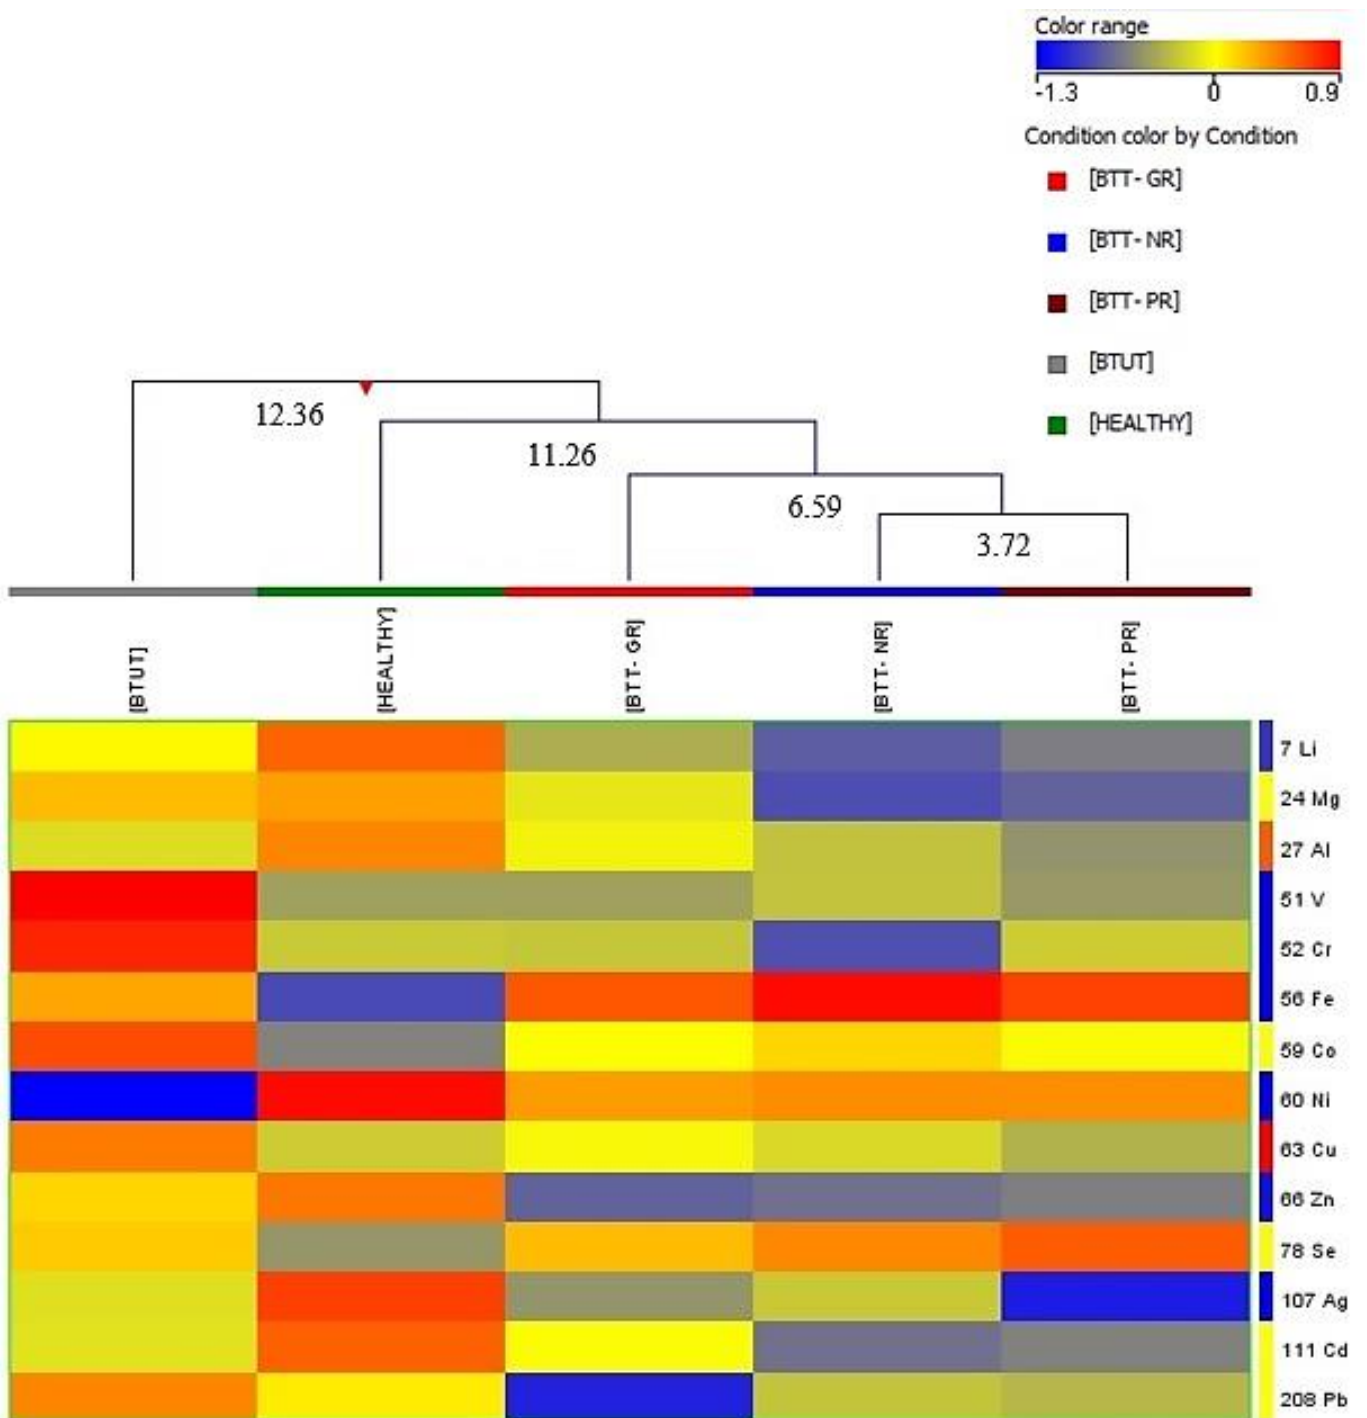

**Figure-S1:** A dendrogram expressing the normalized intensity values taken from healthy controls, HU untreated  $\beta$ -thalassemia patients, and HU treated three groups of responders i.e. GR, PR and NR.
